# Supplementary material
Source: Springer Nature journal article supplement (https://www.springermedizin.de/resource/supplementary/12985_2014_2444_MOESM2_ESM.pdf/9606750)

DNA marker    wild type    mutant  
marker    HHRz    HHRz

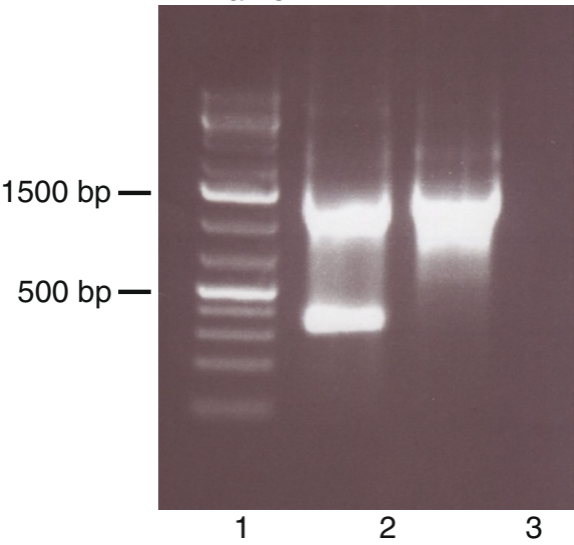

Supplement: MOESM2 [file 9606750]
